# Supplementary material for: The Relation of Surgical Procedures and Diagnosis Groups to Unplanned Readmission in Spinal Neurosurgery: A Retrospective Single Center Study
Source: MDPI journal article supplement (doi:10.3390/ijerph19084795), 2022-04-15
Supplement: s1 [file s1]

## Supplementary Material

**Table S1.** Included diagnoses for the four diagnosis groups according to ICD-10-GM.

| index diagnosis group | ICD-10-GM |
|-----------------------|-----------|
| <b>degenerative</b>   |           |
| cervical stenosis     | M48.02    |
|                       | M48.03    |
| thoracic stenosis     | M48.04    |
| lumbar stenosis       | M48.05    |
|                       | M48.06    |
| cervical herniation   | M50.0     |
|                       | M50.1     |
|                       | M50.2     |
| lumbar herniation     | M51.0     |
|                       | M51.1     |
|                       | M51.2     |
| listhesis             | M43.1     |
| <b>neoplasm</b>       |           |
| unknown tumor         | D43.4     |
| meningeoma            | D32.1     |
| benign neoplasm       | D33.4     |
|                       | D36.1     |
|                       | D48.1     |
| malign neoplasm       | C72.0     |
|                       | C72.1     |
| plasmocytoma          | C90.20    |
| cyst                  | G96.1     |
|                       | M70.8     |
| <b>functional</b>     |           |
| chronic pain          | G54.4     |
|                       | K62.8     |
|                       | M25.56    |
|                       | M54.1     |
|                       | M54.3-5   |
|                       | M54.5     |

|            |        |
|------------|--------|
|            | M89.09 |
|            | M96.1  |
|            | R52.2  |
| spasticity | S34.11 |
|            | G82    |
|            | G83    |

---

**other**

---

|                            |        |
|----------------------------|--------|
| discitis                   | M46.49 |
| abscess                    | G06.1  |
|                            | G06.2  |
| epidural hematoma          | G95.10 |
|                            | S06.4  |
| arteriovenous fistula      | I77.0  |
| arteriovenous malformation | Q28.88 |
| hemangioma                 | D18.08 |
| spina bifida               | Q05    |
| tethered cord              | Q06.8  |
| borreliosis                | A68.1  |

---

*ICD-10-GM, Classification of Diseases and Related Health Problems, 10th Revision, German Modification.*

**Table S2.** Listing of operation and procedure codes according to the OPS coding system 2020.

| Surgical access and procedures |                                       | OPS code                       |
|--------------------------------|---------------------------------------|--------------------------------|
| surgical access                | subcutaneous                          | 5-896                          |
|                                |                                       | 5-039.d                        |
|                                |                                       | 5-039.f/g/h/m/n/p/q            |
|                                |                                       | 5-059.c0/1                     |
|                                |                                       | 5-059.d/g/h                    |
|                                | intraspinal extradural                | 5-030 ff                       |
|                                |                                       | 5-031 ff                       |
|                                |                                       | 5-032 ff                       |
|                                |                                       | 5-083.1                        |
|                                |                                       | 5-832                          |
|                                | material implantation                 | 5-033.0                        |
|                                |                                       | 5-836                          |
|                                |                                       | 5-83b.5                        |
|                                |                                       | 5-83b.7                        |
|                                |                                       | 5-039.d                        |
|                                |                                       | 5-837                          |
|                                |                                       | 5-039.e/f/g/h/m/n/p/q          |
|                                |                                       | 5-059.c0/1                     |
|                                |                                       | 5-059.d/g/h                    |
|                                |                                       | 5-038 ff                       |
|                                |                                       | 5-039.32-39                    |
|                                |                                       | 5-039.8                        |
|                                |                                       | 5-039.a/b/c without 5-039.a8/9 |
|                                |                                       | 5-039.c6/7                     |
|                                |                                       | 5-039.a8/9                     |
|                                |                                       | 5-039.c6/7                     |
|                                |                                       | 5-039.j/k                      |
|                                | intraspinal intradural                | 5-039.8                        |
|                                |                                       | 5-039.a6/7                     |
|                                |                                       | 5-039.c4/5                     |
|                                |                                       | 5-039.g                        |
|                                |                                       | 5-034.0/1/2                    |
|                                | intraspinal intradural intramedullary | 5-035.0                        |

|                    |                                            |                                |
|--------------------|--------------------------------------------|--------------------------------|
|                    |                                            | 5-035.1                        |
|                    |                                            | 5-034.3/4/5                    |
| surgical procedure | sequestrectomy and nucleotomy              | 5-831                          |
|                    |                                            | 5-830.1                        |
|                    | spinal decompression                       | 5-832                          |
|                    |                                            | 5-033.0                        |
|                    | intervertebral cage fusion                 | 5-83b.7                        |
|                    | spondylodesis                              | 5-836                          |
|                    |                                            | 5-83b.5                        |
|                    | spinal cord stimulation                    | 5-039.32-39                    |
|                    |                                            | 5-039.8                        |
|                    |                                            | 5-039.a/b/c without 5-039.a8/9 |
|                    |                                            | 5-039.c6/7                     |
|                    | pulse generator implantation               | 5-039.d                        |
|                    |                                            | 5-039.f/g/h/m/n/p/q            |
|                    |                                            | 5-059.c0/1                     |
|                    |                                            | 5-059.d/g/h                    |
|                    | resection of intraspinal tumor, except for | 5-035.0                        |
|                    | neurinoma                                  | 5-035.1                        |
|                    |                                            | 5-035.2                        |
|                    |                                            | 5-035.3                        |
|                    |                                            | 5-035.4                        |
|                    |                                            | 5-035.5                        |
|                    | resection of intraspinal neurinoma         | 5-035.6                        |
|                    |                                            | 5-035.7                        |
|                    |                                            | 5-041                          |
|                    | wound débridement                          | 5-896                          |
|                    | medication pump implantation               | 5-038 ff                       |
|                    | peripheral nerve stimulation               | 5-059.8                        |
|                    |                                            | 5-059.9                        |
|                    |                                            | 5-059.a                        |
|                    |                                            | 5-059.c                        |
|                    | resection of intraspinal empyema           | 5-034.2                        |
|                    |                                            | 5-033.3                        |
|                    | resection of intraspinal hematoma          | 5-033.2                        |

|                                         |            |
|-----------------------------------------|------------|
|                                         | 5-034.1    |
|                                         | 5-034.4    |
| corporectomy                            | 5-837      |
| dorsal root ganglion stimulation        | 5-039.a8/9 |
|                                         | 5-039.c6/7 |
|                                         | 5-039.j/k  |
| resection of arteriovenous malformation | 5-399.1    |
| lumbar puncture                         | 1-204.2    |
| biopsy                                  | 1-502.4    |
| cancel/abort procedure                  | 5-995      |
| resection of spinal abscess             | 5-034.5    |

*OPS code, operation and procedure code.*

**Table S3.** Predictors for unplanned readmission. Univariate logistic regression for demographic data and hospital characteristics.

| Univariate regression            | OR (95% CI)           | p-value |
|----------------------------------|-----------------------|---------|
| <b>total cohort</b>              |                       |         |
| age, >48 years                   | 2.39 (1.063-5.363)    | 0.035   |
| PCCL, >7                         | 2.35 (1.332-4.163)    | 0.003   |
| discharge at own discretion      | 4.56 (0.523-39.772)   | 0.170   |
| surgery, ≥2 interventions        | 2.94 (1.093-7.891)    | 0.033   |
| night shift surgery <sup>a</sup> | 49.61 (4.396-559.85)  | 0.002   |
| comorbidity <sup>b</sup>         | 2.03 (1.147-3.575)    | 0.015   |
| previous organ transplantation   | 11.43 (1.019-128.195) | 0.048   |
| <i>index diagnosis groups</i>    |                       |         |
| lumbar herniation                | 0.51 (0.246-1.064)    | 0.073   |
| cervical stenosis                | 3.81 (0.520-27.96)    | 0.188   |
| lumbar stenosis                  | 2.05 (1.150-3.649)    | 0.015   |

|                                       |                       |       |
|---------------------------------------|-----------------------|-------|
| abscess                               | 22.88 (1.410-371.179) | 0.028 |
| chronic pain                          | 1.74 (0.893-3.405)    | 0.103 |
| <b>surgical group</b>                 |                       |       |
| age, >50 years                        | 3.30 (1.275-8.53 )    | 0.014 |
| LOS, >6 days                          | 2.67 (1.385-5.132)    | 0.003 |
| comorbidity <sup>b</sup>              | 2.40 (1.241-4.629)    | 0.009 |
| surgeries, ≥2 interventions           | 2.94 (1.093-7.891)    | 0.033 |
| diabetes mellitus                     | 2.83 (0.674-11.919)   | 0.155 |
| previous organ<br>transplantation     | 12.10 (1.072-136.405) | 0.044 |
| <i>surgical access</i>                |                       |       |
| subcutaneous                          | 3.22 (0.710-14.624)   | 0.129 |
| intrapinal extradural                 | 1.58 (0.826-3.034)    | 0.167 |
| <i>surgical procedure</i>             |                       |       |
| Wound débridement                     | 3.74 (0.814-17.212)   | 0.090 |
| sequestrectomy and<br>nucleotomy      | 2.40 (1.042-5.501)    | 0.040 |
| spondylodesis                         | 2.16 (0.874-5.340)    | 0.095 |
| resection of intraspinal<br>neurinoma | 3.47 (0.760-15.854)   | 0.108 |
| Generator implantation                | 2.43 (0.824-7.182)    | 0.107 |
| dorsal root ganglion<br>stimulation   | 9.82 (1.843-52.352)   | 0.007 |
| <i>index diagnosis group</i>          |                       |       |
| lumbar herniation                     | 2.41 (0.995-5.824)    | 0.051 |
| lumbar stenosis                       | 2.29 (1.183-4.44)     | 0.014 |
| abscess                               | 24.22 (1.486-394.754) | 0.025 |
| benign tumor                          | 4.82 (0.549-42.31)    | 0.156 |

|                           |                       |       |
|---------------------------|-----------------------|-------|
| chronic pain              | 1.74 (0.804-3.750)    | 0.160 |
| <b>non-surgical group</b> |                       |       |
| gender, female            | 3.55 (0.937-13.47)    | 0.062 |
| PCCL, >1                  | 4.86 (1.193-347.539)  | 0.016 |
| <i>discharge</i>          |                       |       |
| at own discretion         | 20.36 (1.193-347.539) | 0.037 |
| external hospital         | 20.36 (1.193-347.539) | 0.037 |
| home                      | 14.80 (2.218-98.760)  | 0.005 |

*CI*, 95% confidence interval; *LOS*, length of stay; *OR*, odds ratio, *PCCL*, patient clinical complexity level. <sup>a</sup> night shift: 7 p.m. until before 7 a.m. <sup>b</sup> comorbidity: defined as five or more side diagnoses
